# Supplementary material for: “Honeycomb catalytic strategy” for carbonylation reaction based on the structural evolution of cobalt species
Source: Royal Society of Chemistry journal article supplement (doi:10.1039/d4cy00127c), 2024-01-01
Supplement: d4cy00127c1.pdf [file d4cy00127c1.pdf]

## Supporting Information

### **“Honeycomb Catalytic Strategy” for Carbonylation Reaction Based on the Structural Evolution of Cobalt Species**

**Peng Zhang <sup>a,b,c</sup>, Liying An <sup>a,b,c</sup>, Chunqiu Zhao <sup>b</sup>, Qiang Chang <sup>b</sup>, Fei Wang <sup>a,b,\*</sup>,  
Chenghua Zhang <sup>b,\*</sup>, Yulei Zhu <sup>a,b</sup>, Yong Yang <sup>a,b</sup>, Yongwang Li <sup>a,b</sup>**

*<sup>a</sup>State Key Laboratory of Coal Conversion, Institute of Coal Chemistry, Chinese Academy of Sciences, Taiyuan 030001, P. R. China*

*<sup>b</sup>National Energy Center for Coal to Liquids, Synfuels China Co., Ltd, Huairou District, Beijing 101400, P. R. China*

*<sup>c</sup>University of Chinese Academy of Sciences, No. 19A Yuquan Road, Beijing 100049, P. R. China*

*\*E-mail: wangfei908@sxicc.ac.cn; zhangchh@sxicc.ac.cn*

# Content

## 1. Computational Section

## 2. Supplementary Figures

**Figure S1.** H<sub>2</sub>-TPR profiles of the supported cobalt catalysts.

**Figure S2.** XRD patterns of the supported cobalt catalysts.

**Figure S3.** XPS spectra of the supported cobalt catalysts.

**Figure S4.** TEM images of the supported cobalt catalysts.

**Figure S5.** (a) N<sub>2</sub> adsorption-desorption isotherms and (b) BJH desorption pore size distributions of the supported cobalt catalysts.

**Figure S6.** Catalytic performance of the Co/C catalyst on methoxycarbonylation of propylene oxide. Conversion (line) and selectivity (bar) as a function of (a) temperature, (b) pressure, and (c) time.

**Figure S7.** The yield of MHB and Co retention ratio for different catalysts after the reaction.

**Figure S8.** Photographs of supernatant of the Co/C catalyst under different post-treatment temperatures. (a) fresh reactants; (b) without post-treatment; (c) temperature, 75°C; (d) temperature, 190°C.

**Figure S9.** XRD patterns of the Co/C catalyst (a) fresh, (b) used, and (c) recycled 4 times through the “honey catalytic process”.

**Figure S10.** HRTEM and nanoparticles size distribution of the used Co/C catalyst.

## 3. Supplementary Tables

**Table S1.** BET specific surface area and cobalt loading amount of the supported catalyst.

**Table S2.** ICP-OES results of cobalt leaching from catalysts.

**Table S3.** Catalytic run of recycled Co/C catalyst in the methoxycarbonylation of propylene oxide.

## 1. Computational Section

In this section, we chose FCC-Co bulk and monoclinic  $\text{Co}_2(\text{CO})_8$  crystals as calculated models, and crystal structures and unit cell parameters are shown in the table below.

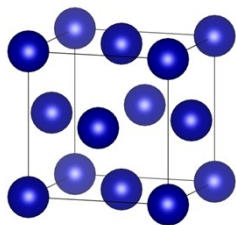

FCC-Co

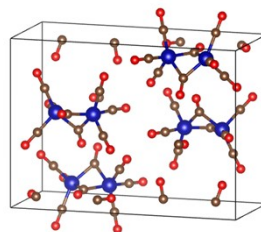

$\text{Co}_2(\text{CO})_8$

|                            | Space group            | Lattice parameters (Å) | Angles (°)                       |
|----------------------------|------------------------|------------------------|----------------------------------|
| FCC-Co                     | Fm3m(225)              | a=b=c=3.51             | $\alpha=\beta=\gamma=90$         |
| $\text{Co}_2(\text{CO})_8$ | P2 <sub>1</sub> /m(11) | a=6.48 b=15.35 c=11.09 | $\alpha=\gamma=90$ $\beta=90.54$ |

## 2. Supplementary Figures

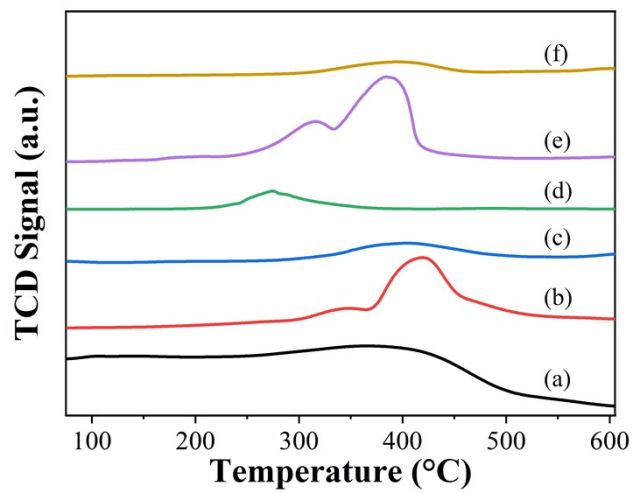

**Figure S1.** H<sub>2</sub>-TPR profiles of the supported cobalt catalysts (a)Co/C, (b) Co/ $\gamma$ -Al<sub>2</sub>O<sub>3</sub>, (c) Co/S1-Silicalite, (d) Co/SiO<sub>2</sub>, (e) Co/TiO<sub>2</sub>, and (f) Co/CeO<sub>2</sub>.

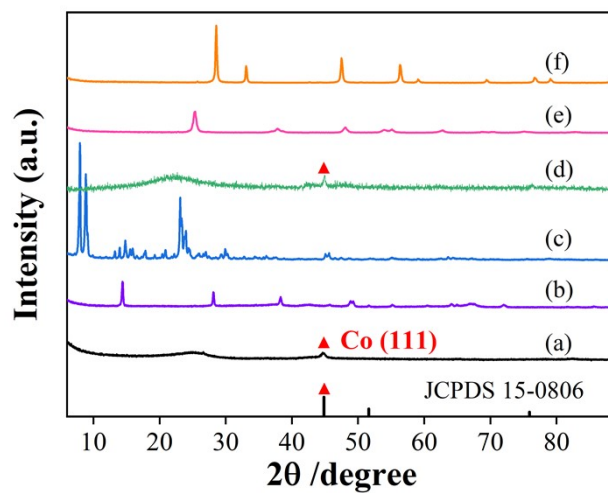

**Figure S2.** XRD patterns of the supported cobalt catalysts (a)Co/C, (b) Co/ $\gamma$ -Al<sub>2</sub>O<sub>3</sub>, (c) Co/S1-Silicalite, (d) Co/SiO<sub>2</sub>, (e) Co/TiO<sub>2</sub>, and (f) Co/CeO<sub>2</sub>.

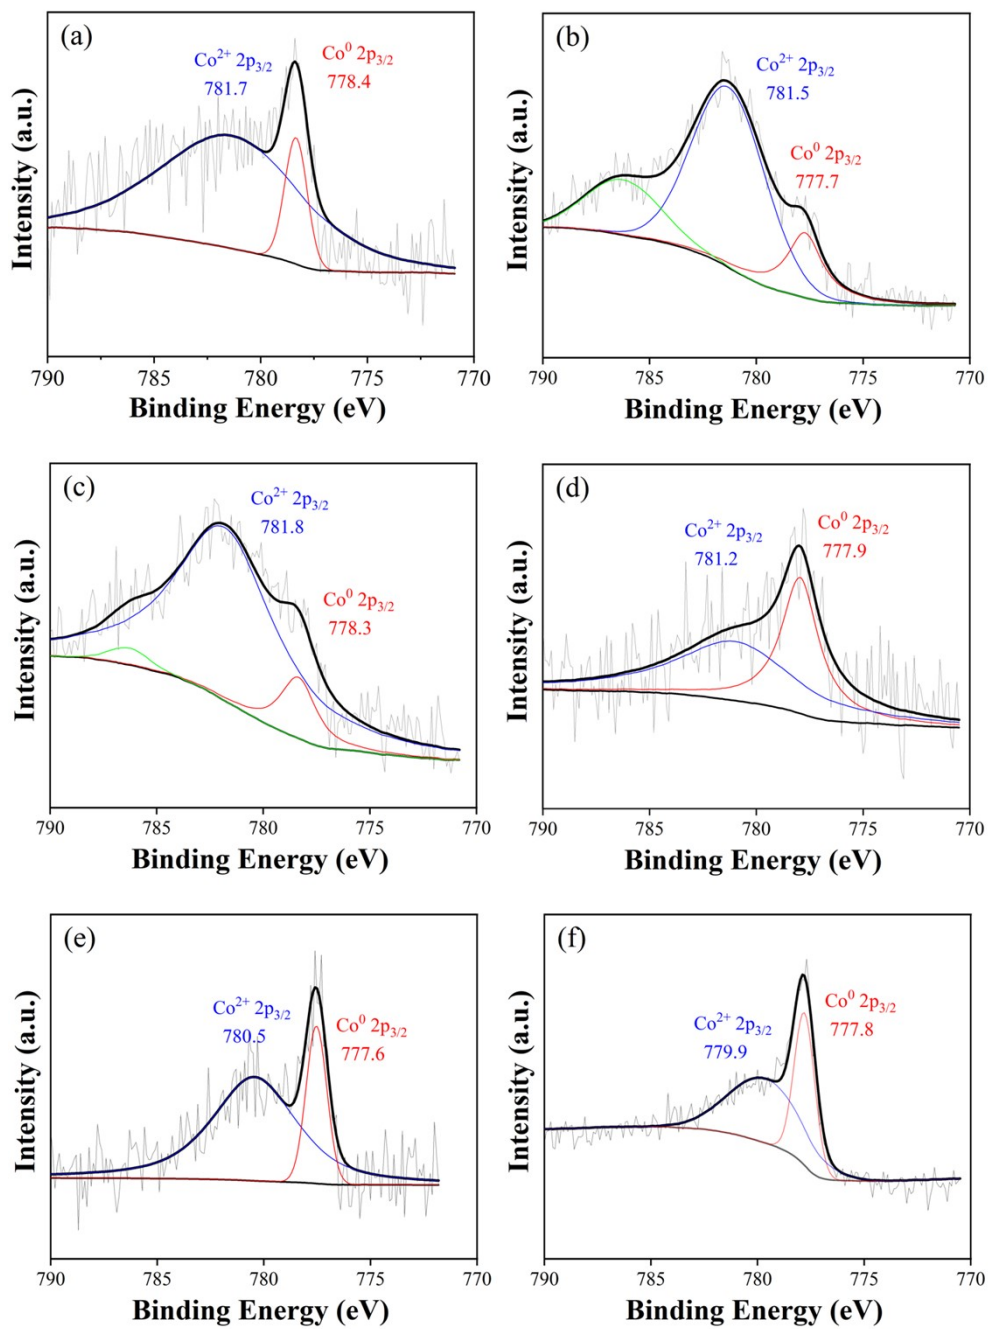

**Figure S3.** XPS spectra of the supported cobalt catalysts (a)Co/C, (b) Co/γ-Al<sub>2</sub>O<sub>3</sub>, (c) Co/S1-Silicalite, (d) Co/SiO<sub>2</sub>, (e) Co/TiO<sub>2</sub>, and (f) Co/CeO<sub>2</sub>.

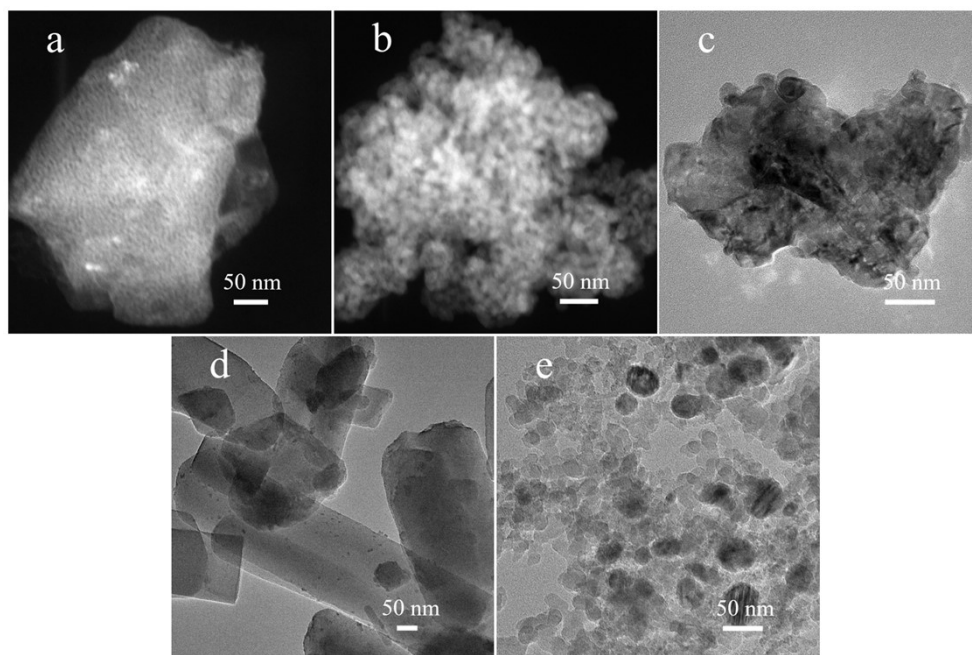

**Figure S4.** TEM images of the supported cobalt catalysts (a)  $\gamma$ - $\text{Al}_2\text{O}_3$ , (b)  $\text{TiO}_2$ , (c)  $\text{CeO}_2$ , (d) S1-Silicalite, and (e)  $\text{SiO}_2$ .

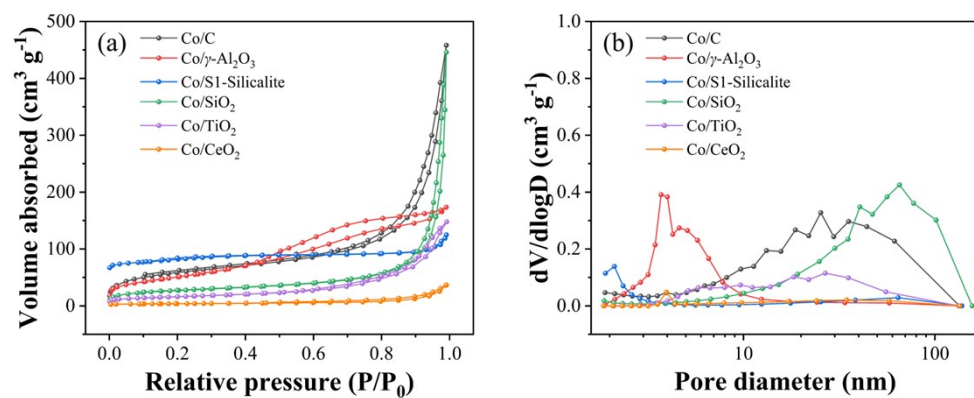

**Figure S5.** (a) N<sub>2</sub> adsorption-desorption isotherms and (b) BJH desorption pore size distributions of the supported cobalt catalysts.



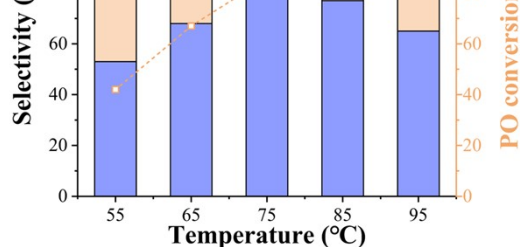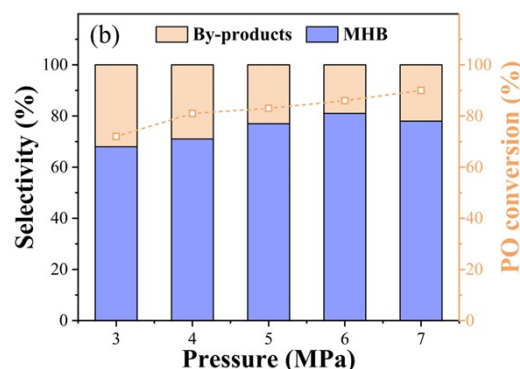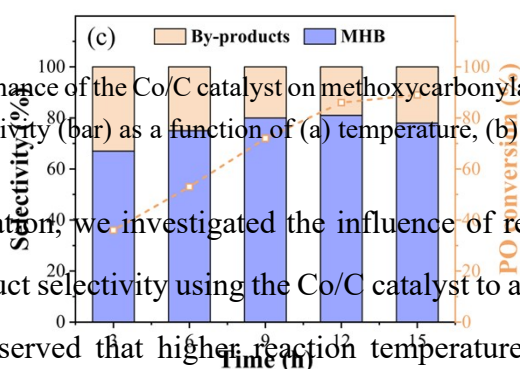

**Figure S6.** Catalytic performance of the Co/C catalyst on methoxycarbonylation of propylene oxide. Conversion (line) and selectivity (bar) as a function of (a) temperature, (b) pressure, and (c) time.

In the initial investigation, we investigated the influence of reaction conditions on PO conversion and product selectivity using the Co/C catalyst to attain optimal reaction performance. It was observed that higher reaction temperatures in this exothermic reaction were not conducive to achieving a high equilibrium yield and resulted in increased formation of by-products. While the PO conversion increased from 42% to 92% as the temperature rose from 55°C to 95°C, the highest yield of 70% MHB was obtained at 75°C. Hence, 75°C was selected as the optimal reaction temperature. Further optimization indicated that 6 MPa was sufficient, and a reaction time of 12 hours was advisable.

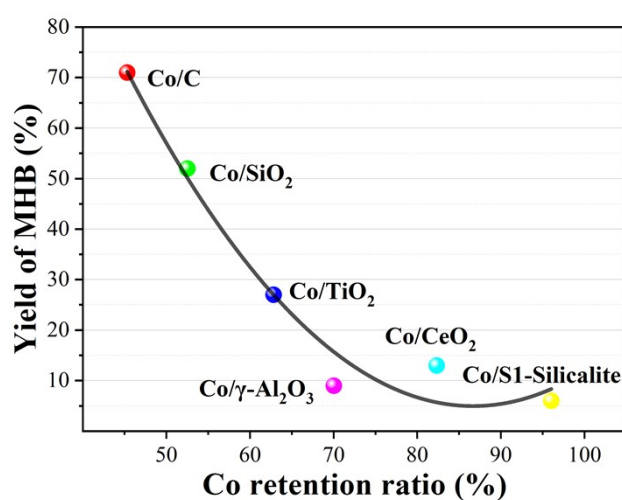

**Figure S7.** The yield of MHB and Co retention ratio for different catalysts after the reaction.

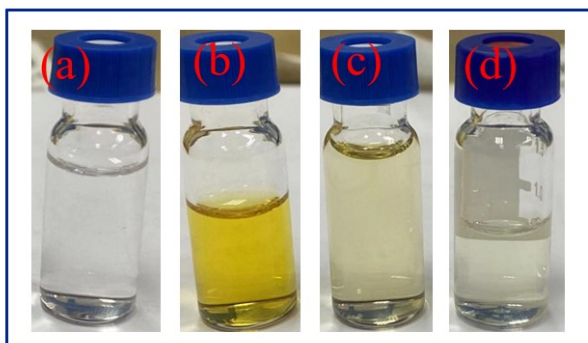

**Figure S8.** Photographs of supernatant of the Co/C catalyst under different post-treatment temperatures. (a) fresh reactants; (b) without post-treatment; (c) 75°C; (d) 190°C.

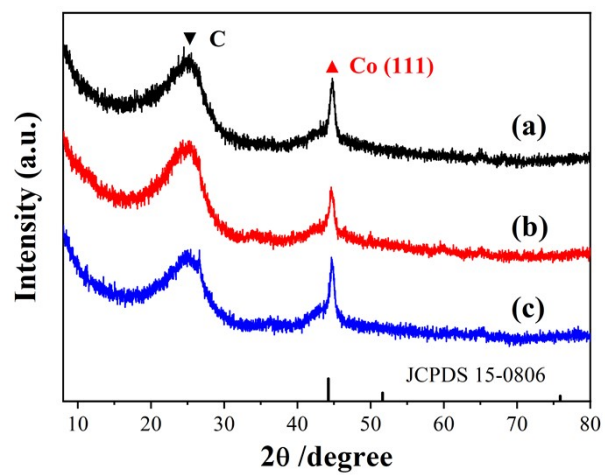

**Figure S9.** XRD patterns of the Co/C catalyst (a) fresh, (b) used, and (c) recycled 4 times through the “honey catalytic process”.

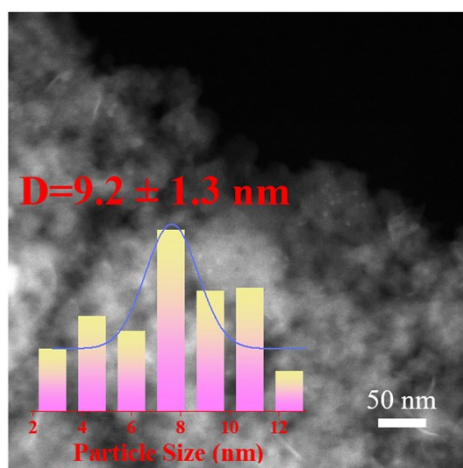

**Figure S10.** HRTEM and the cobalt nanoparticles size distribution of the used Co/C catalyst.

### 3. Supplementary Tables

**Table S1.** BET specific surface area and cobalt loading amount of the supported catalyst.

| Sample | Catalyst                                     | Specific surface area (m <sup>2</sup> /g) | Co loading (wt%) |
|--------|----------------------------------------------|-------------------------------------------|------------------|
| 1      | Co/C                                         | 231.0                                     | 3.01             |
| 2      | Co/SiO <sub>2</sub>                          | 97.6                                      | 3.04             |
| 3      | Co/TiO <sub>2</sub>                          | 57.5                                      | 2.67             |
| 4      | Co/CeO <sub>2</sub>                          | 13.3                                      | 2.72             |
| 5      | Co/ $\gamma$ -Al <sub>2</sub> O <sub>3</sub> | 186.8                                     | 2.63             |
| 6      | Co/ S1-Silicalite                            | 278.6                                     | 2.84             |
| 7      | Co/C-1                                       | 217.9                                     | 10.40            |
| 8      | Co/C-2                                       | 201.7                                     | 20.79            |

**Table S2.** ICP-OES results of cobalt leaching from catalysts.

| Entry | Catalyst                                     | Co content of supernatant ( $\mu\text{g/g}$ ) <sup>a</sup> | Co retention ratio (%) <sup>a</sup> | Co content of supernatant ( $\mu\text{g/g}$ ) <sup>b</sup> | Co retention ratio (%) <sup>b</sup> |
|-------|----------------------------------------------|------------------------------------------------------------|-------------------------------------|------------------------------------------------------------|-------------------------------------|
| 1     | Co/C                                         | 660.1                                                      | 45.3                                | 13.3                                                       | 98.9                                |
| 2     | Co/SiO <sub>2</sub>                          | 573.4                                                      | 52.5                                | 9.5                                                        | 99.2                                |
| 3     | Co/TiO <sub>2</sub>                          | 449.1                                                      | 62.8                                | 13.7                                                       | 98.9                                |
| 4     | Co/CeO <sub>2</sub>                          | 213.6                                                      | 82.3                                | 15.4                                                       | 98.7                                |
| 5     | Co/ $\gamma$ -Al <sub>2</sub> O <sub>3</sub> | 362.2                                                      | 70.0                                | 7.2                                                        | 99.4                                |
| 6     | Co/S1-Silicalite                             | 48.3                                                       | 96.0                                | 19.3                                                       | 98.4                                |
| 7     | Co/C-1                                       | 649.2                                                      | 46.3                                | 32.6                                                       | 97.3                                |
| 8     | Co/C-2                                       | 602.1                                                      | 50.2                                | 35.7                                                       | 96.2                                |

Standard reaction conditions: propylene oxide, 6 mmol; n[Co]/n[3-hydroxypyridine] = 1:3; methanol, 9 mL; initial pressure of CO, 6 MPa; reaction time, 12 hours; temperature, 75°C; catalyst, n[Co]/n[PO] = 1:40; stirring rate, 600 rpm.

<sup>a</sup> Without post-treatment. <sup>b</sup> With post-treatment.

Post-treatment conditions: Venting CO slowly and charging N<sub>2</sub> with an initial pressure of 6 MPa; temperature, 190°C; time, 12 hours; stirring rate, 150 rpm.

**Table S3.** Catalytic run of recycled Co/C catalyst in the methoxycarbonylation of propylene oxide.

| Entry | Run            | Conversion (%) | Selectivity (%) | Yield (%) | Co retention ratio (%) |
|-------|----------------|----------------|-----------------|-----------|------------------------|
| 1     | 1 <sup>a</sup> | 89             | 80              | 71        | 45.3                   |
| 2     | 2 <sup>a</sup> | 53             | 65              | 34        | 23.7                   |
| 3     | 3 <sup>a</sup> | 37             | 56              | 21        | 14.6                   |
| 4     | 4 <sup>a</sup> | 24             | 13              | 3         | 8.9                    |
| 5     | 1 <sup>b</sup> | 91             | 78              | 71        | 98.9                   |
| 6     | 2 <sup>b</sup> | 86             | 76              | 65        | 97.1                   |
| 7     | 3 <sup>b</sup> | 87             | 77              | 67        | 96.7                   |
| 8     | 4 <sup>b</sup> | 84             | 75              | 63        | 95.2                   |

Standard reaction conditions: propylene oxide, 6 mmol; n[Co]/n[3-hydroxypyridine] = 1:3; methanol, 9 mL; initial pressure of CO, 6 MPa; reaction time, 12 hours; temperature, 75°C; catalyst, n[Co]/n[PO] = 1:40; stirring rate, 600 rpm. Determined by gas chromatograph with diphenyl as an internal standard.

<sup>a</sup> Without post-treatment. <sup>b</sup> With post-treatment.

Post-treatment conditions: Venting CO slowly and charging N<sub>2</sub> with an initial pressure of 6 MPa; temperature, 190°C; time, 12 hours; stirring rate, 150 rpm.
